# Supplementary material for: Prognostic value from integrative analysis of transcription factors c-Jun and Fra-1 in oral squamous cell carcinoma: a multicenter cohort study
Source: PubMed Central journal article supplement (PMC5548725; doi:10.1038/s41598-017-05106-5), 2017-08-08

---

**Prognostic value from integrative analysis of transcription factors c-Jun and Fra-1 in oral squamous cell carcinoma: a multicenter cohort study**

Hao Xu<sup>1,2,3#</sup>, Xin Jin<sup>4,2#</sup>, Yao Yuan<sup>2</sup>, Peng Deng<sup>2</sup>, Lu Jiang<sup>2</sup>, Xin Zeng<sup>2</sup>, Xiao-Song Li<sup>1</sup>, Zhi-Yong Wang<sup>2\*</sup>, Qian-Ming Chen<sup>1,2\*</sup>.

<sup>1</sup> Department of epidemiology and health statistics, West China School of Public Health, Sichuan University, Chengdu 610041, China;

<sup>2</sup> Department of Oral Biology and Medicine, State Key Laboratory of Oral Diseases, West China School of Stomatology, Sichuan University, Chengdu 610041, China;

<sup>3</sup> School of Mathematics, Sichuan University, Chengdu 610041, China;

<sup>4</sup> Chongqing Key Laboratory of Oral Diseases and Biomedical Sciences, College of Stomatology, Chongqing Medical University, Chongqing 400016, China.

**# These authors contributed equally to this work**

**\* Corresponding author:**

**Qian-Ming Chen**, Department of epidemiology and health statistics, West China School of Public Health, Sichuan University, 16 South Renmin Road, Chengdu 610041, China; Fax & Phone: +86 28 85405251; E-mail: [qmchen@scu.edu.cn](mailto:qmchen@scu.edu.cn).

**Zhi-Yong Wang**, Department of Oral Biology and Medicine, State Key Laboratory of Oral Diseases, West China School of Stomatology, Sichuan University, 14 South Renmin Road, Chengdu 610041, China; Phone: +1 3019066811; E-mail: [zhiyong.wang@scu.edu.cn](mailto:zhiyong.wang@scu.edu.cn).

---

## Titles and legends for Supplementary Figures

### Supplementary Figure S1. The original immunohistochemical staining of patients' tissue from the West China Hospital of Stomatology (Chengdu, China)

- A. The immunohistochemical staining of c-Jun.
- B. The immunohistochemical staining of Fra-1

### Supplementary Figure S2. The survival curves of OSCC patients with different expressions of c-Jun and Fra-1 in different tumor clinical TNM stages

The four images above were from c-Jun's (A, B, C, D) and the below were from Fra-1 (E, F, G, H). From left to right, they were stage 1 (A, E), stage 2 (B, F), stage 3 (C, G) and stage 4 (D, H), separately. The *P* values were from the log-rank tests for the overall survival.

### Supplementary Figure S3. Interaction effects between c-Jun and Fra-1 during each clinical TNM stage

The points are the adjusted Hazzard Ratios (*HRs*), and the error bars are the 95% *CI*. The *HR* were from the interaction factors of c-Jun and Fra-1 in the multiple Cox models. The adjusted *HRs* (95%*CI*s; *P* values) are as followed: stage 1:1.72037(0, Inf.; *P*:0.9991); stage 2:0.1098 (0.0251, 0.4810; *P*:0.0034), stage 3:0.4056 (0.1164, 1.4140; *P*:0.1567), stage 4:1.1467 (0.0477, 27.5850; *P*:0.9328).

### Supplementary Figure S1.

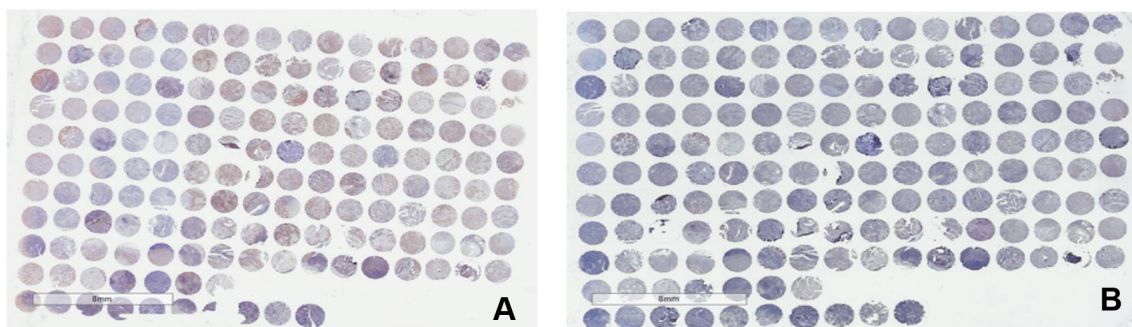

## Supplementary Figure S2.

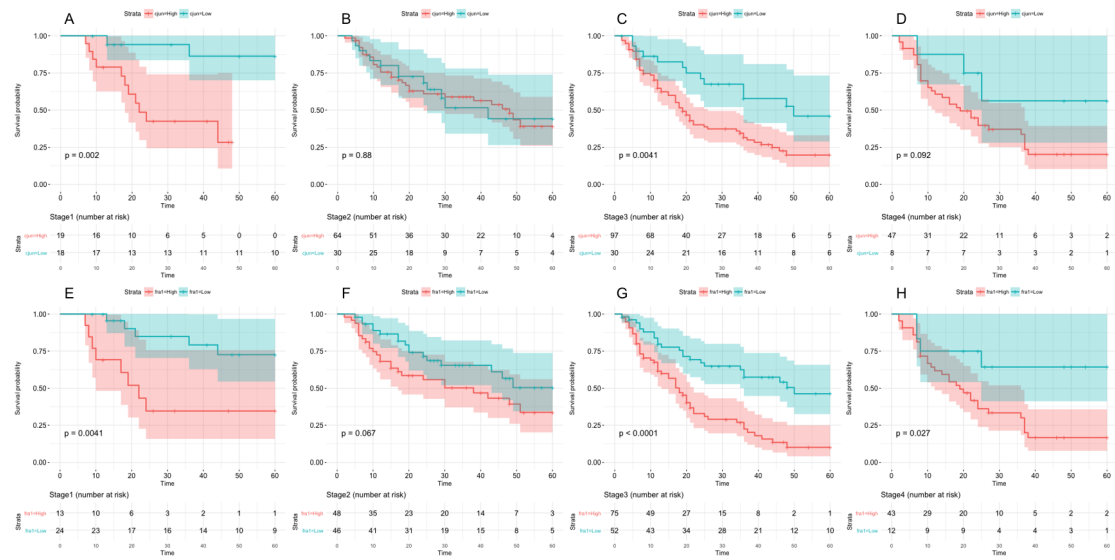

## Supplementary Figure S3.

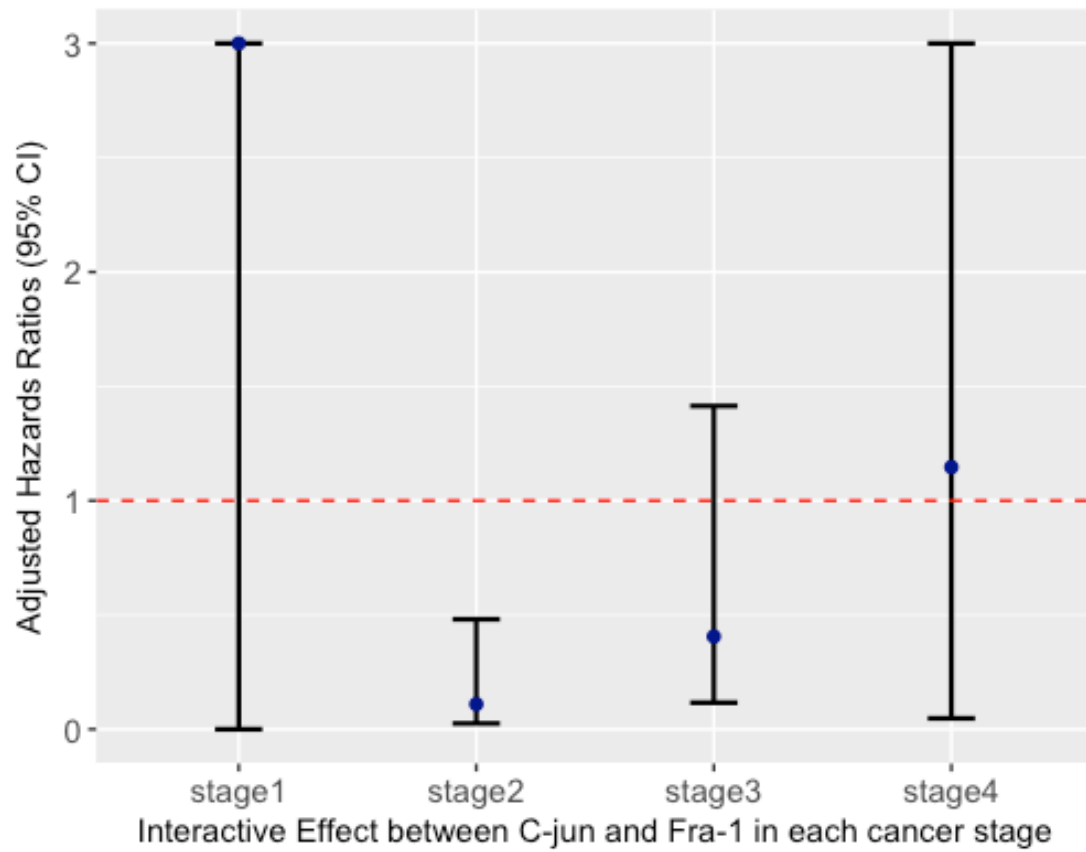

Supplement: 41598_2017_5106_MOESM1_ESM.pdf [file 41598_2017_5106_MOESM1_ESM.pdf]
